# Supplementary material
Source: Springer Nature journal article supplement (https://www.springermedizin.de/resource/supplementary/12883_2014_972_MOESM3_ESM.pdf/9456578)

a)

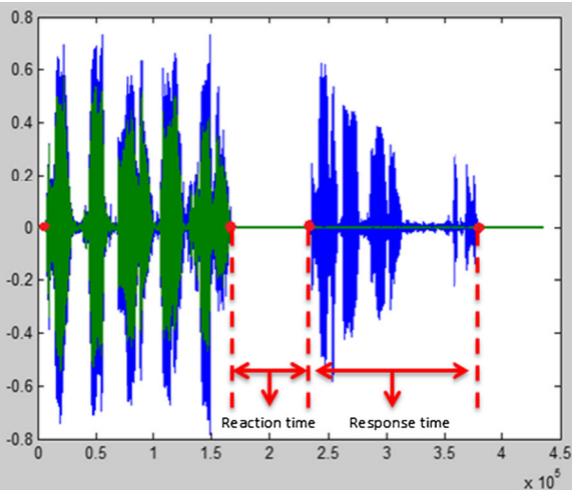

b)

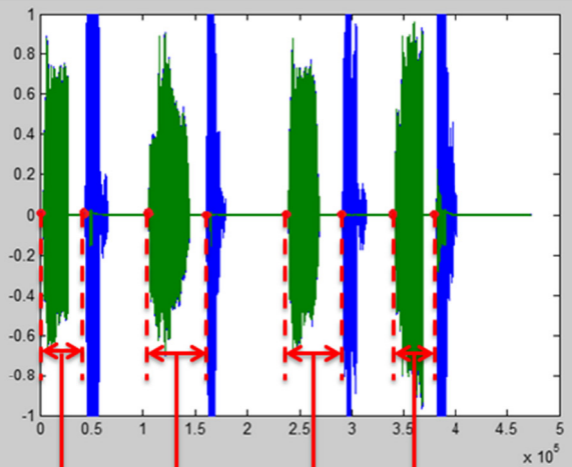Reaction  
time 1Reaction  
time 2Reaction  
time 3Reaction  
time 4

Supplement: MOESM3 [file 9456578]
